# Supplementary material for: CircDOCK1 Regulates miR-186/DNMT3A to Promote Osteosarcoma Progression
Source: MDPI journal article supplement (doi:10.3390/biomedicines10123013), 2022-11-23
Supplement: s1 [file s1]

Supplementary Table S1. Primer sequences in this study

|           |         |                                |
|-----------|---------|--------------------------------|
| CircDOCK1 | Forward | 5'- CCAGAGGCACGTCCAGATTA -3'   |
|           | Reverse | 5'- AGGAAACTCCGCGTCTAGG -3'    |
| miR-186   | Forward | 5'- TTAATTCCGATAACGAACGAGA -3' |
|           | Reverse | 5'- CGCTGAGCCAGTCAGTG TAG -3'  |
| DNMT3A    | Forward | 5'- TATGAACAGGCCGTTGGCATC -3'  |
|           | Reverse | 5'- AAGAGGTGGCGGATGACTGG -3'   |
| GAPDH     | Forward | 5'- CCTGCCGGTGACTAACCCTG -3'   |
|           | Reverse | 5'- TCCACCACTGACACGTTGGC -3'   |
